# Supplementary material
Source: PubMed Central journal article supplement (PMC5926941)
Supplement: jciinsight-3-93626-s001.pdf [file jciinsight-3-93626-s001.pdf]

# Supplemental Figure 1

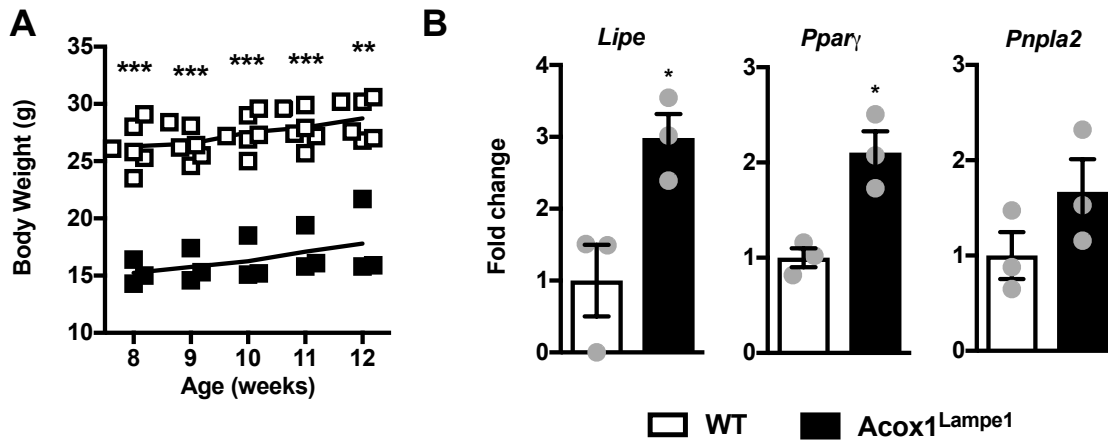

**Supplemental Figure 1. *Acox1*<sup>Lampe1</sup> mutation impacts weight gain and white adipose tissue (WAT) lipolysis.** 8 week old *Acox1*<sup>Lampe1</sup> mice and WT littermate controls were fed a chow diet for 4 weeks. **(A)** Body weight. **(B)** mRNA expression of lipolytic genes (*Lipe*, *Pparg* and *Pnpla2*) in epididymal WAT. Data represent means + SE. Unpaired student's t-test \*P < 0.01, \*\*P < 0.01, \*\*\*P < 0.001. **(A)** White squares denote WT mice; Black squares denote *Acox1*<sup>Lampe1</sup> mice. **(B)** White bars denote WT mice; Black bars denote *Acox1*<sup>Lampe1</sup> mice. **(A)** Representative of 3 individual experiments, n = 3-6/condition. **(B)** A single experiment, n = 3/condition. Data combined from two independent experiments.

## Supplemental Figure 2

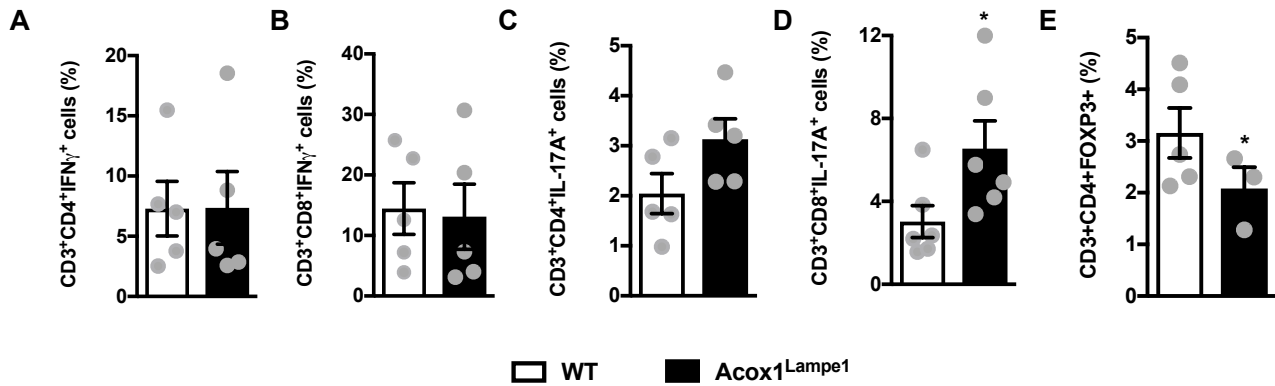

**Supplemental Figure 2. *Acox1<sup>Lampe1</sup>* mutation alters hepatic immune cell infiltration.** 12 week old, chow diet fed, *Acox1<sup>Lampe1</sup>* mice and WT littermate controls were examined for presence of hepatic CD4<sup>+</sup> and CD8<sup>+</sup> T cell populations. (A and B) Frequency of hepatic CD4<sup>+</sup> and CD8<sup>+</sup> T cells producing IFNG. (C and D) Frequency of hepatic CD4<sup>+</sup> and CD8<sup>+</sup> T cells producing IL-17A. (E) Frequency of hepatic T<sub>reg</sub> cells (CD3<sup>+</sup>CD4<sup>+</sup>FOXP3<sup>+</sup>). Data represent means + SE. Unpaired student's t-test \*P < 0.05. White bars denote WT mice; Black bars denote *Acox1<sup>Lampe1</sup>* mice. Data combined from two independent experiments, n = 6/condition.

## Supplemental Figure 3

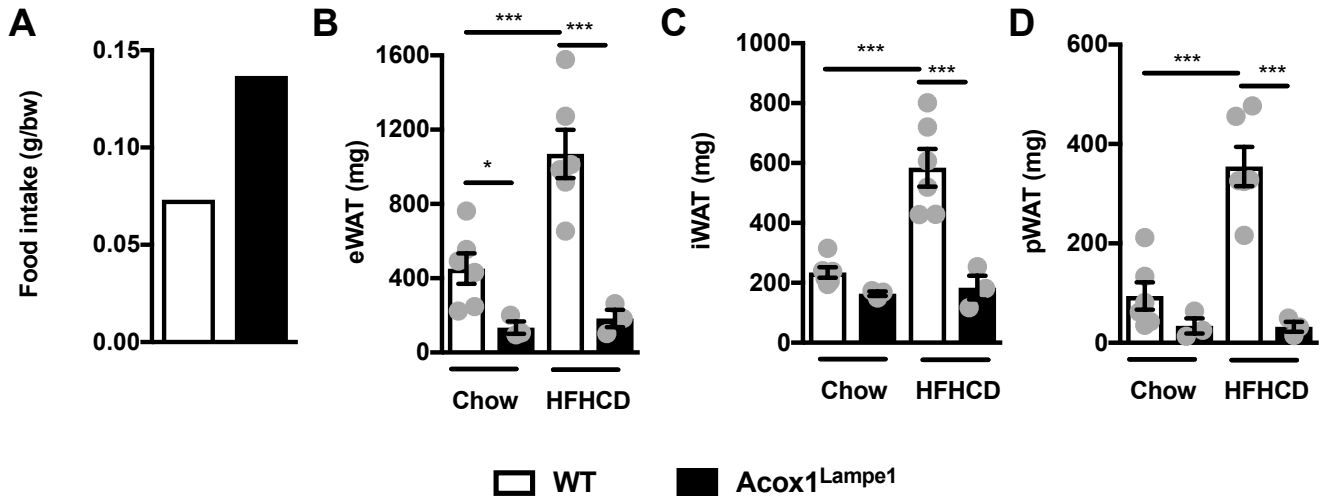

**Supplemental Figure 3. Additional parameters from *Acox1<sup>Lampe1</sup>* mice and WT littermate controls fed a chow or HFHCD.** 8 week old *Acox1<sup>Lampe1</sup>* mice and WT littermate controls were fed a HFHCD or chow diet for 4 weeks – continuation of findings depicted in Figure 4. **(A)** Food intake. **(B-D)** White adipose tissue weights: **(B)** epididymal (eWAT), **(C)** inguinal (iWAT) and **(D)** perirenal (pWAT). Data represent means + SE. **(B-D)** ANOVA followed by Tukey's correction \*P < 0.01, \*\*P < 0.01, \*\*\*P < 0.001. **(A-D)** White bars denote WT mice; Black bars denote *Acox1<sup>Lampe1</sup>* mice. **(A)** Representative of 2 individual experiments, n = 3/condition. **(B-D)** Data combined from two independent experiments, n=3/condition.

## Supplemental Figure 4

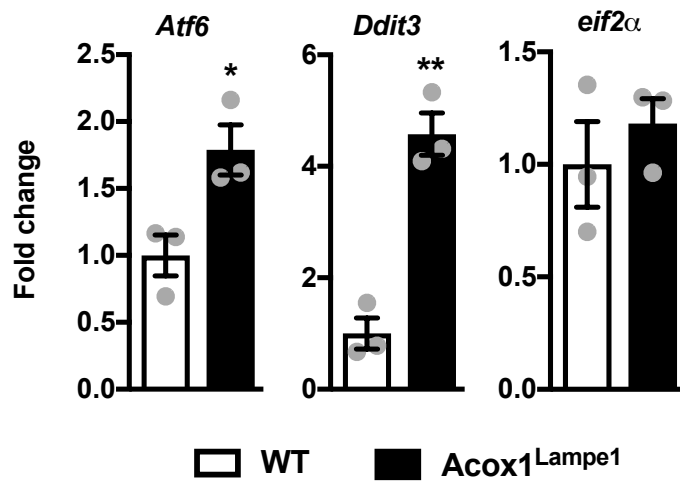

**Supplemental Figure 4. *Acox1*<sup>Lampe1</sup> mice exhibit increased hepatic mRNA expression of ER stress-associated genes following HFHCD feeding.** 8 week old *Acox1*<sup>Lampe1</sup> mice and WT littermate controls were fed a HFHCD for 4 weeks. Hepatic *Atf6*, *Ddit3* and *eif2A* mRNA expression. Data represent means + SE. Unpaired student's t-test \*P < 0.05, \*\*P < 0.01. White bars denote WT mice fed HFHCD; Black bars denote *Acox1*<sup>Lampe1</sup> mice fed HFHCD. A single experiment, n = 3/condition.

## Supplemental Figure 5

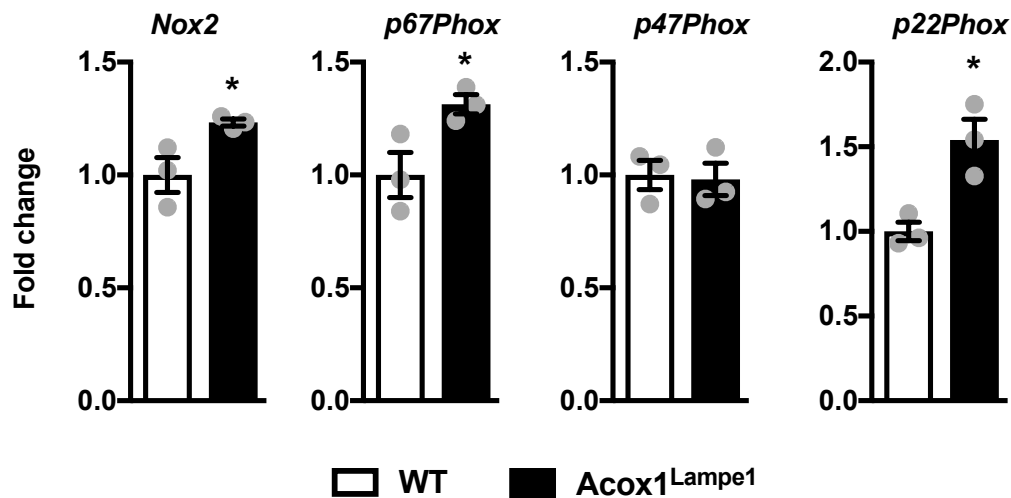

**Supplemental Figure 5. Acox1<sup>Lampe1</sup> mice exhibit increased hepatic mRNA expression of ROS-associated enzymes following HFHCD feeding.** 8 week old Acox1<sup>Lampe1</sup> mice and WT littermate controls were fed a HFHCD for 4 weeks. Hepatic *Nox2*, *p67Phox*, *p47Phox* and *p22Phox* mRNA expression. Data represent means + SE. Unpaired student's t-test \*P < 0.05. White bars denote WT mice fed HFHCD; Black bars denote Acox1<sup>Lampe1</sup> mice fed HFHCD. A single experiment, n = 3/condition

## Supplemental Figure 6

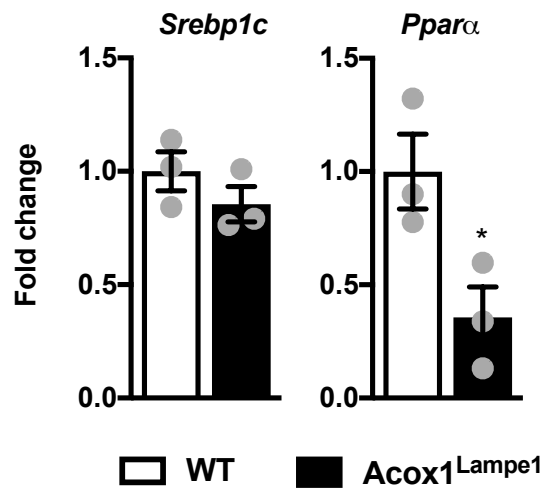

**Supplemental Figure 6. Acox1<sup>Lampe1</sup> mutation partially modulates expression of markers associated with fatty acid oxidation in context of HFHCD feeding.** 8 week old Acox1<sup>Lampe1</sup> mice and WT littermate controls were fed a HFHCD for 4 weeks. Hepatic *Srebp-1c* and *Ppara* mRNA expression. Data represent means + SE. Unpaired student's t-test \*P < 0.05. White bars denote WT mice; Black bars denote Acox1<sup>Lampe1</sup> mice. A single experiment, n = 3/condition.

## Supplemental Figure 7

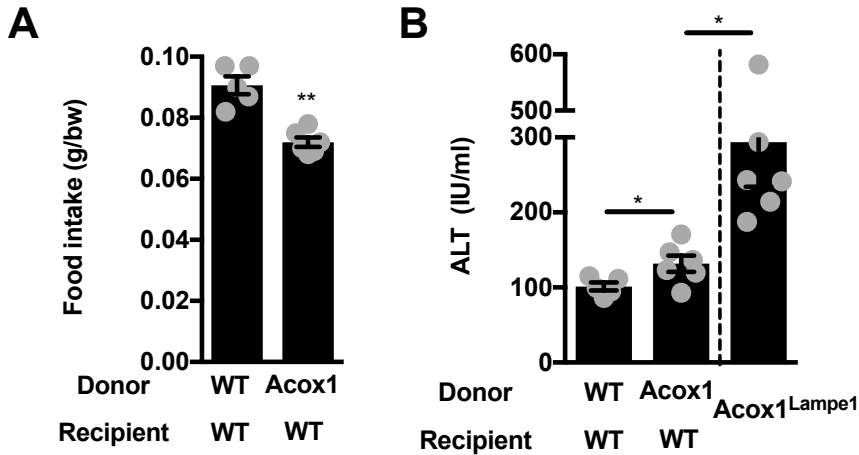

**Supplemental Figure 7. Additional parameters from bone marrow transfer studies.** 8-10 week old WT mice were lethally irradiated and subsequently reconstituted with bone marrow (BM) from WT or Acox1<sup>Lampe1</sup> mice, as depicted in Figure 5. Following successful immunological reconstitution mice were fed a HFHCD for 4 weeks. **(A)** Food intake. **(B)** Comparison of serum ALT levels between bone marrow transplanted mice and Acox1<sup>Lampe1</sup> mice (total body mutants; as depicted in Figure 4) fed a HFHCD for 4 weeks. Data represent means + SE. Unpaired student's t-test \*P < 0.05, \*\*P < 0.01. A single experiment, n = 5-6/condition.

# Supplemental Figure 8

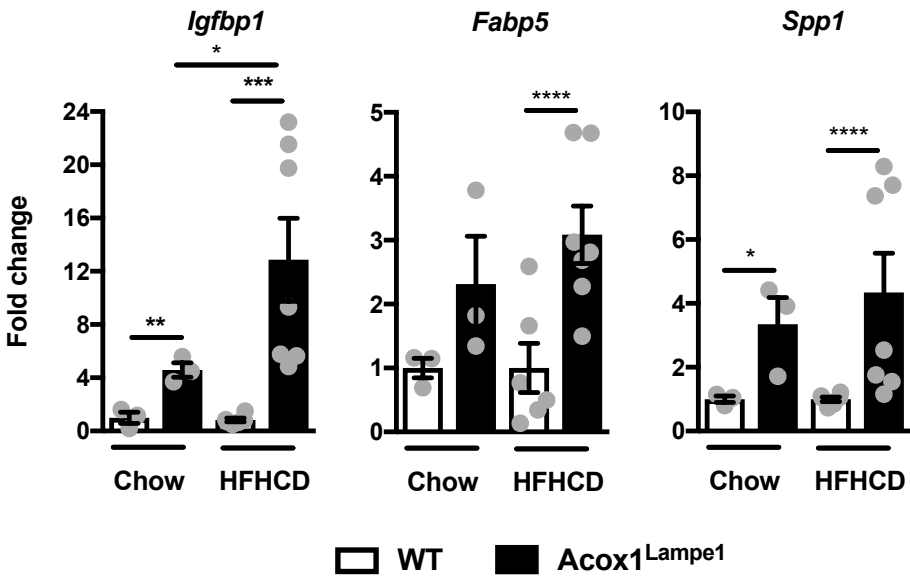

**Supplemental Figure 8. Additional parameters from studies focused on hepatic gene expression in *Acox1<sup>Lampe1</sup>* mice and WT littermate controls fed a chow or HFHCD.** 8 week old *Acox1<sup>Lampe1</sup>* mice and WT littermate controls were fed a HFHCD or chow diet for 4 weeks, as depicted in Figure 7. Hepatic *Igfbp1*, *Fabp5*, and *Spp1* mRNA expression. Data represent means + SE. ANOVA Tukey's correction \*\*P < 0.01, \*\*\*P < 0.001. White bars denote WT mice; Black bars denote *Acox1<sup>Lampe1</sup>* mice. Data combined from two independent experiments, n = 3-6/condition.



## Supplemental Figure 9

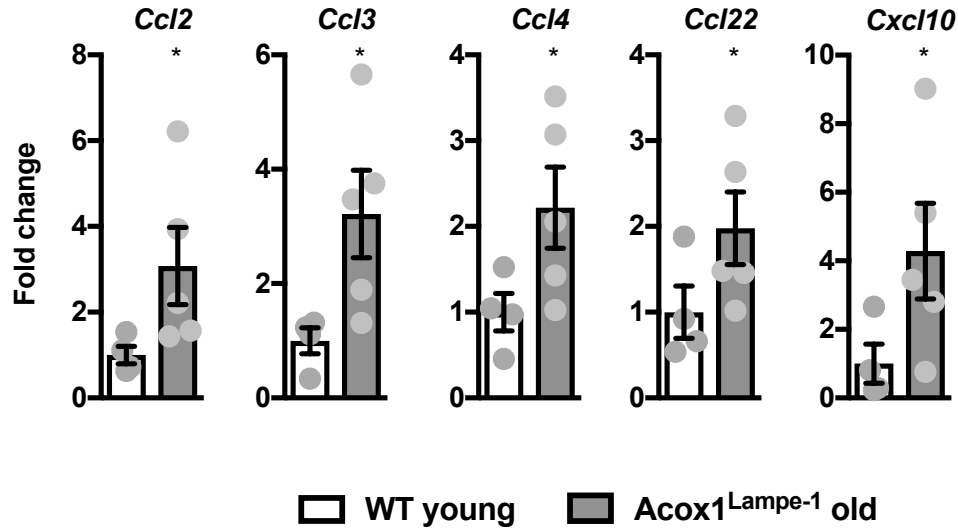

**Supplemental Figure 9. Acox1<sup>Lampe-1</sup> mutation spontaneously induces hepatic chemokines expression with age.** 59 weeks old Acox1<sup>Lampe-1</sup> mice and 12 weeks old WT controls (n=3-4/condition) were fed chow diet. Hepatic *Ccl2*, *Ccl3*, *Ccl4*, *Ccl22*, and *Cxcl10* mRNA expression. Data represent means + SE. Unpaired student's t-test \*P < 0.05. White bars denote young WT mice; Gray bars denote old Acox1<sup>Lampe-1</sup> mice. A single experiment, n = 3-5/condition.
